# Supplementary material for: p38α (MAPK14) critically regulates the immunological response and the production of specific cytokines and chemokines in astrocytes
Source: PubMed Central journal article supplement (PMC4264013; doi:10.1038/srep07405), 2014-12-12
Supplement: srep07405-s1.pdf [file srep07405-s1.pdf]

**p38 $\alpha$  (MAPK14) CRITICALLY REGULATES THE IMMUNOLOGICAL RESPONSE AND THE PRODUCTION OF SPECIFIC CYTOKINES AND CHEMOKINES IN ASTROCYTES**

U-Ging Lo, Vimal Selvaraj, Jennifer M. Plane, Olga V. Chechneva, Kinya Otsu and Wenbin Deng

**Supplementary Information**

**Table S1. Primer sets used for genotyping PCR**

|                     |                |                                               |
|---------------------|----------------|-----------------------------------------------|
| hGFAP-Cre           | Forward        | 5'-ACT CCT TCA TAA AGC CCT-3'                 |
|                     | Reverse        | 5'-ATC ACT CGT TGC ATC GAC CG-3'              |
| p38 $\alpha$ floxed | Forward        | 5'-AGC CAG GGC TAT ACA GAG AAA AAC CCT GTG-3' |
|                     | Reverse        | 5'-ATG AGA TGC AGT ACC CTT GGA GAC CAG AAG-3' |
| ROSA26-MT/MG        | WT-Forward     | 5'-CTC TGC TGC CTC CTG GCT TCT-3'             |
|                     | WT-Reverse     | 5'-CGA GGC GGA TCA CAA GCA ATA-3'             |
|                     | Mutant-Reverse | 5'-TCA ATG GGC GGG GGT CGT T-3'               |

**Table S2. Inventoried assays used for quantitative PCR**

| Gene         | Entrez Gene ID | Catalog number* |
|--------------|----------------|-----------------|
| CCL2         | NM_011333      | QT00167832      |
| CCL3         | NM_011337      | QT00248199      |
| CXCL1        | NM_008176      | QT00115647      |
| CXCL2        | NM_009140      | QT00113253      |
| CXCL10       | NM_021274      | QT00093436      |
| TNF $\alpha$ | NM_013693      | QT00104006      |
| IL-6         | NM_031168      | QT00098875      |
| IL-1 $\beta$ | NM_008361      | QT01048355      |
| ICAM         | NM_010493      | QT00155078      |
| VCAM         | NM_011693      | QT00128793      |
| GFAP         | NM_010277      | QT00101143      |
| CD68         | NM_009853      | QT00254051      |
| Itgam        | NM_008401      | QT00156471      |
| Ly6G         | XM_909927      | QT00529655      |

\* Catalog numbers are from Qiagen, Valencia, CA.

**Primers designed for quantitative PCR**

| Gene   | Entrez Gene ID | Sequence |                                       |
|--------|----------------|----------|---------------------------------------|
| Rpl13a | NM_009438      | Forward  | 5'-CAT TCT GGA GGA GAA ACG GAA GG-3'  |
|        |                | Reverse  | 5'-GCA GGC ATG AGG CAA ACA GTC-3'     |
| CCL4   | NM_013652      | Forward  | 5'-TTC CTG CTG TTT CTC TTA CAC CT-3'  |
|        |                | Reverse  | 5'-CTG TCT GCC TCT TTT GGT CAG-3'     |
| CCL5   | NM_013653      | Forward  | 5'-GCT GCT TTG CCT ACC TCT CC-3'      |
|        |                | Reverse  | 5'-TCG AGT GAC AAA CAC GAC TGC-3'     |
| COX2   | NM_011198      | Forward  | 5'-ATG AGT GGT AGC CAG CAA AGC CTA-3' |
|        |                | Reverse  | 5'-ACT GAG TAC CAG GCC AGC ACA AA-3'  |
